# Supplementary material
Source: publisher figshare collection journal article supplement (https://tandf.figshare.com/ndownloader/files/31462407)
Supplement: Supplementary file 1 [file 31462407]

Appendix 1: Comparison of normative data for speech sounds and phonological patterns.

| **Phone and phoneme repertoires of three-year-olds** | | | | | | |
| --- | --- | --- | --- | --- | --- | --- |
| Source and population | Plosives /p b t d k g/ | Nasals /m n ŋ/ | Fricatives /h f v s z ʃ ʒ θ ð/ | Glides /l w j ɹ/ | Affricates /ʧ ʤ/ |
| *Phone repertoires (stimulability)* | | | | | | |
| Current study: Australia | all | all | /h f v s z ʃ/ | /w j l/ | none |
| Dodd et al. (2002): UK & Australia | all | all | /h f v s z/ | /w j l/ | / ʧ / |
| *Phoneme repertoires (correct production in words)* | | | | | |
| Kilminster & Laird (1978): Australia | all | all | /h f ʒ / | /w j/ | none |
| Goldman & Fristoe (2015): USA | all | all | /h f/ | /w/ | none |
| Grunwell (1985): UK | all | all | /h f s/ | /w j l/ | none |
| Crowe & McLeod (2020): USA | all | all | / h f/ | /w j/ | none |

| **Phonological patterns of three-year-olds** | | | | | | | | |
| --- | --- | --- | --- | --- | --- | --- | --- | --- |
| Source and population | Gliding | De-affrication | Cluster reduction | Fronting | Weak syllable deletion | Stopping | Voicing | Final consonant deletion |
| Current study: Australia | | | | | | | | |
| 3;0-3;5 |  |  | * |  |  |  |  |  |
| 3;6-3;8 |  |  | * |  |  |  |  |  |
| Dodd et al. (2002): UK & Australia | | | | | | | | |
| 3;0-3;5 |  |  |  |  |  |  |  |  |
| 3;6-3;11 |  |  |  |  |  |  |  |  |
| Grunwell (1985): UK (case study data) | | | | | | | | |
| 3;0-3;6 |  |  |  |  |  |  |  |  |
| 3;6-4;0 |  |  |  |  |  |  |  |  |
| Clinical guidelines for phonological processes used by 3-year-olds: based on others’ data/clinical experience | | | | | | | | |
| Little Bee Speech (n.d.) |  |  |  |  |  |  |  |  |
| Bowen (2011) |  |  |  |  |  |  |  |  |
| * ≥5 examples of atypical cluster reduction in ≥ 10% of sample, plus some typical cluster reduction | | | | | | | | |
